# Supplementary material
Source: PubMed Central journal article supplement (PMC5100756)
Supplement: supp_pp.16.01291_PP2016-01291R1_Supplemental_Figures_and_Tables.pdf [file supp_pp.16.01291_PP2016-01291R1_Supplemental_Figures_and_Tables.pdf]

1 **Supplemental Figure S1.** Variant ACC2 splice site and altered transcripts in the Spro-2 accession.

2

---

|    | EXON 29 -----   | Intron 29 -----                                  | Exon 30 -----                                                    |
|----|-----------------|--------------------------------------------------|------------------------------------------------------------------|
| 3  |                 |                                                  |                                                                  |
| 4  |                 |                                                  |                                                                  |
| 5  | Col-0 Genomic   | AACGTGACTGGCCGTACCTGCACTGTCCAT                   | <u>gt</u> aaattcagctt (62x) ttcatgtttc <u>ag</u> ATATACCGAGAAGTG |
| 6  | Spro-2 Genomic: | AAC <u>GT</u> GACTGGCCGTACCTGCACT <u>GT</u> CCAT | <u>tt</u> aaattcagctt (62x) ttcatgtttc <u>ag</u> ATATACCGAGAAGTG |
| 7  | Transcript #1   | AACGTGACTGGCCGTACCTGCACTGTCCAT                   | <u>tt</u> aaattcagctt (62x) ttcatgtttc <u>ag</u> ATATACCGAGAAGTG |
| 8  | Transcript #2   | AACGTGACTGGCCGTACCT <u>A</u> CACTGTCCAT          | <u>tt</u> aaattcagctt (62x) ttcatgtttc <u>ag</u> ATATACCGAGAAGTG |
| 9  | Transcript #3   | AAC <u>GT</u> GACTGGCCGTACCTGCACTGTCCAT          | <u>tt</u> aaattcagctt (62x) ttcatgtttc <u>ag</u> ATATACCGAGAAGTG |
| 10 | Transcript #4   | AACGTGACTGGCCGTACCTGCACT <u>GT</u> CCAT          | <u>tt</u> aaattcagctt (62x) ttcatgtttc <u>ag</u> ATATACCGAGAAGTG |

---

- 11
- 12 **Col-0 Genomic** Intron 29 (87 bp) contains normal splice donor (gt) and acceptor (ag) sites. Some nucleotides (x) not specified, for clarity.
- 13 **Spro-2 Genomic** Intron 29 splice donor site changed from “gt” to “tt” (highlighted with gray background). Alternative sites noted in blue.
- 14 **Transcript #1 (2/9)** Intron 29 retained in a defective transcript (green) encoding a truncated protein (1567 residues; final 6 residues altered).
- 15 **Transcript #2 (2/9)** Same as transcript #1 except for an unexplained G>A mutation (highlighted) and C1558Y variant in the truncated protein.
- 16 **Transcript #3 (4/9)** Intron 29 removed (red), along with 27 nucleotides from exon 29, to encode a defective protein missing 9 residues (1553-61).
- 17 **Transcript #4 (1/9)** Intron 29 removed (red), along with 6 nucleotides from exon 29, to encode a defective protein missing 2 residues (1560-61).

18

---

19 Other variant transcripts may be present, but were not included among the nine cloned RT-PCR products specific to ACC2 that were evaluated.

20 **Supplemental Figure S2.** Short ACC2 deletion and altered transcripts in the Ip-Ber-0 accession.

21

---

|                     | EXON 17  | Intron 17           | -----  | EXON 18   | -----                                                                       |
|---------------------|----------|---------------------|--------|-----------|-----------------------------------------------------------------------------|
| 24 Col-0 Genomic    | XXXXXXXX | <u>gt</u> xxx (72x) | gtcaat | tttggcttg | ttc <u>ag</u> AATGATCATGATCCTTCGAAGTTGATGGCTGAGACACCAT (58X) XXXAGXXXXXXXX  |
| 25 Ip-Ber-0 Genomic | XXXXXXXX | <u>gt</u> xxx (72x) | gtcaa  | -----     | -----TGATCCTTCGA <u>AG</u> TTGATGGCTGAGACACCAT (58X) XXX <u>AG</u> XXXXXXXX |
| 26 Transcript #1    | XXXXXXXX | <u>gt</u> xxx (72x) | gtcaa  | -----     | -----TGATCCTTCGAAGTTGATGGCTGAGACACCAT (58X) XXXAGXXXXXXXX                   |
| 27 Transcript #2    | XXXXXXXX | <u>gt</u> xxx (72x) | gtcaa  | -----     | -----TGATCCTTCGA <u>AG</u> TTGATGGCTGAGACACCAT (58X) XXXAGXXXXXXXX          |
| 28 Transcript #3    | XXXXXXXX | <u>gt</u> xxx (72x) | gtcaa  | -----     | -----TGATCCTTCGAAGTTGATGGCTGAGACACCAT (58X) XXX <u>AG</u> XXXXXXXX          |

---

30 **Col-0 Genomic** Intron 17 (97 bp; lower case) contains normal splice donor (gt) and acceptor (ag) sites. Some nucleotides (X) not specified, for clarity

31 **Ip-Ber-0 Genomic** Confirmed deletion (**red dash**), not clearly reflected in 1001 Genomes data, removes final 15 bp of intron 17 and first 8 bp of exon 18.

32 **Transcript #1 (5/8)** Intron 17 retained and included in a defective transcript (**green**) encoding a truncated protein (805 residues; final 32 residues altered).

33 **Transcript #2 (2/8)** Intron 17 removed (**red**), along with 21 nucleotides from exon 18, to encode a defective protein missing 7 residues (774-780).

34 **Transcript #3 (1/8)** Intron 17 removed, along with 103 nucleotides from exon 18, to encode a truncated protein (777 residues; final 4 residues altered).

---

36 Other variant transcripts may be present, but were not included among the eight cloned RT-PCR products evaluated. The 23 bp deletion is not accurately  
 37 reflected in 1001 Genomes data, which fills in the missing nucleotides with the adjacent, downstream sequence.









323 **Sixth row:** Protein domains; 1, Transit peptide; 2, Biotin carboxylase; 3, Biotin carboxyl carrier protein; 4, Central domain; 5,  
324 Carboxyltransferase, beta subunit; 6, Carboxyltransferase, alpha subunit; \*, Biotin binding site within the BCCP domain.

325 **Supplemental Table S1.** Seedling responses of 20 accessions with the ACC2 variants I404K and T1902K.

326

| Accession     | ABRC Seed Stock | Genetic Screen | Variant Confirmation <sup>a</sup> | Spectinomycin Response |       |           |
|---------------|-----------------|----------------|-----------------------------------|------------------------|-------|-----------|
|               |                 |                |                                   | Category               | Score | Seedlings |
| Knox-18       | CS76530         | Forward        | A                                 | Hypersensitive         | 1.1   | 80        |
| RRS-10        | CS76592         | Forward        | A                                 | Sensitive              | 1.3   | 81        |
| Gifu-2        | CS76494         | Forward        | B                                 | Sensitive              | 1.3   | 78        |
| Tul-0         | CS76618         | Forward        | A                                 | Sensitive              | 1.7   | 81        |
| Tol-0         | CS76614         | Forward        | A                                 | Sensitive              | 2.0   | 73        |
| Pna-10        | CS76574         | Forward        | C                                 | Sensitive              | 1.4   | 112       |
| Buckhorn Pass | CS76733         | Reverse        | D                                 | Sensitive              | 1.7   | 29        |
| Dem-4         | CS76794         | Reverse        | D                                 | Sensitive              | 1.7   | 28        |
| Gre-0         | CS76497         | Reverse        | D                                 | Sensitive              | 1.4   | 48        |
| MIC-31        | CS77082         | Reverse        | D                                 | Sensitive              | 2.1   | 49        |
| MNF-Jac-12    | CS77097         | Reverse        | D                                 | Sensitive              | 2.5   | 33        |
| MNF-Pot-21    | CS77099         | Reverse        | D                                 | Hypersensitive         | 1.4   | 50        |
| MNF-Pot-75    | CS77100         | Reverse        | D                                 | Sensitive              | 2.2   | 32        |
| Mdn-1         | CS77077         | Reverse        | E                                 | Sensitive              | 2.9   | 43        |
| Mv-0          | CS76556         | Reverse        | D                                 | Hypersensitive         | 1.1   | 56        |
| NC-6          | CS77124         | Reverse        | D                                 | Sensitive              | 1.6   | 54        |
| PT2.21        | CS77191         | Reverse        | D                                 | Sensitive              | 1.5   | 55        |
| Rmx-A02       | CS76589         | Reverse        | D                                 | Sensitive              | 2.1   | 36        |
| Rmx-A180      | CS77218         | Reverse        | D                                 | Sensitive              | 1.8   | 42        |
| SLSP-31       | CS77254         | Reverse        | D                                 | Sensitive              | 1.4   | 53        |

<sup>a</sup> A, Predicted variants confirmed; B, Both variants confirmed, I404K not predicted; C, Both confirmed, neither predicted; D, Not tested; E, Both confirmed, along with E1567K (not predicted).



| Variant <sup>a</sup> | Conservation (%) <sup>b</sup> | Protein Domain <sup>c</sup> | 1001 Genomes Accessions with Predicted Variant | Accessions Evaluated on Spectinomycin <sup>d</sup> | Variant Confirmed | Seedlings Classified | Spectinomycin Response    |            |
|----------------------|-------------------------------|-----------------------------|------------------------------------------------|----------------------------------------------------|-------------------|----------------------|---------------------------|------------|
|                      |                               |                             |                                                |                                                    |                   |                      | Category                  | Score      |
| G135E                | 95.7                          | (BC)                        | 0                                              | Sav-0 <sup>e</sup>                                 | Yes               | 275                  | Hypersensitive            | 1.2        |
| F363L                | 99.3                          | BC                          | 5                                              | Sei-0                                              | Yes               | 56                   | Intermediate              | 6.9        |
| V376A                | 100.0                         | BC                          | 12                                             | Col-0                                              | Yes               | 287                  | Intermediate              | 5.6        |
| I404K                | 94.8                          | BC                          | 20                                             | Knox-18 Group                                      | Yes               | Table IV             | Hypersensitive; Sensitive | Table IV   |
| Y443C                | 94.0                          | BC                          | 1                                              | Etna-2                                             | Yes               | 111                  | Sensitive                 | 1.9        |
| L474F                | 94.5                          | BC                          | 1                                              | Chi-0                                              | Yes               | 75                   | Intermediate              | 5.1        |
| P475L                | 99.7                          | BC                          | 1                                              | Lm-2                                               | Yes               | 70                   | Tolerant                  | 8.3        |
| Q478K                | 97.6                          | BC                          | 28                                             | Multiple <sup>d,f</sup>                            | Assumed           | 126                  | Intermediate              | 6.0        |
|                      |                               |                             |                                                | Uod-1                                              | Yes               | 78                   | Tolerant                  | 8.5        |
| R494G                | 99.9                          | BC                          | 1                                              | Ip-Pal-0                                           | Yes               | 51                   | Intermediate              | 6.1        |
| F520L                | 94.0                          | BC                          | 2                                              | In-0                                               | Yes               | 84                   | Intermediate              | 4.8        |
| T538A                | 99.9                          | BC                          | 1                                              | Ip-Tor-1                                           | Yes               | 46                   | Low Intermediate          | 4.1        |
| V618I                | 90.9                          | BC                          | 9                                              | Ip-Cum-1<br>Ped-0                                  | Yes               | 129<br>56            | Sensitive                 | 2.3<br>3.1 |
|                      |                               |                             |                                                | Ip-Gua-1<br>Ip-Hom-4                               | Yes               | 81<br>94             | Intermediate              | 6.3<br>4.5 |
| N725S                | 96.9                          |                             | 44                                             | Multiple <sup>d,g</sup>                            | Assumed           | 496                  | Intermediate              | 5.8        |
|                      |                               |                             |                                                | Pog-0                                              | Yes               | 60                   | Tolerant                  | 8.6        |
| G739E                | 95.2                          |                             | 1                                              | Wa-1                                               | Yes               | 40                   | Intermediate              | 5.3        |
|                      |                               |                             |                                                | Mh-0                                               | Not Tested        | 28                   | Intermediate              | 6.2        |
| R762C                | 96.6                          |                             | 6                                              | Tsu-0<br>Tu-0                                      | Yes               | 490<br>84            | Tolerant                  | 8.8<br>9.4 |
|                      |                               |                             |                                                | Leska-1-44<br>Smolj-1                              | Yes               | 52<br>51             | Intermediate              | 5.4<br>4.5 |
| G833R                | 99.3                          | BCCP                        | 3                                              | Dja-1                                              | Yes               | 52                   | Intermediate              | 4.6        |
| L847P                | 96.0                          |                             | 1                                              | WAR                                                | Yes               | 39                   | Low Intermediate          | 3.7        |
| F1206L               | 96.3                          |                             | 1                                              | Aitba-1                                            | Yes               | 53                   | Sensitive                 | 2.8        |
| E1355G               | 98.7                          |                             | 116                                            | Multiple <sup>d,h</sup>                            | Assumed           | 625                  | Intermediate              | 5.1        |
|                      |                               |                             |                                                | Ema-1; Si-0                                        | Yes               | 124                  | High Intermediate         | 8.2        |
| R1405Q               | 96.1                          |                             | 1                                              | Db-1                                               | Yes               | 75                   | Intermediate              | 7.2        |
| Y1594H               | 97.9                          |                             | 6                                              | None                                               | Not Tested        | None                 | Not Tested                |            |
| E1689G               | 97.0                          | CT-Beta                     | 1                                              | Ts-1                                               | Yes               | 70                   | Sensitive                 | 2.5        |
| S1739C               | 94.3                          | CT-Beta                     | 12                                             | Multiple <sup>d,i</sup>                            | Assumed           | 97                   | Intermediate              | 5.6        |
|                      |                               |                             |                                                | CYR                                                | Yes               | 76                   | High Intermediate         | 7.8        |

|        |      |          |    |                         |         |     |              |     |
|--------|------|----------|----|-------------------------|---------|-----|--------------|-----|
| G1766D | 97.6 | CT-Beta  | 39 | Multiple <sup>d,j</sup> | Assumed | 380 | Intermediate | 5.7 |
|        |      |          |    | Pog-0                   | Yes     | 60  | Tolerant     | 8.6 |
| I1821V | 98.2 | CT-Beta  | 1  | MNF-Che-2               | Yes     | 53  | Intermediate | 4.3 |
| T1834S | 99.4 | CT-Beta  | 2  | Nemrut-1                | Yes     | 75  | Intermediate | 4.2 |
| S1883T | 97.0 | CT-Beta  | 8  | Multiple <sup>d,k</sup> | Assumed | 211 | Intermediate | 6.2 |
| G1897S | 99.4 | CT-Alpha | 2  | Sch1-7<br>WalhaesB4     | Yes     | 70  | Intermediate | 4.8 |
|        |      |          |    |                         |         | 39  |              | 5.6 |
| P2013L | 98.5 | CT-Alpha | 3  | Balan-1                 | Yes     | 52  | Intermediate | 6.2 |
| A2014E | 99.0 | CT-Alpha | 1  | Appl-16                 | Yes     | 54  | Intermediate | 5.6 |
| A2059V | 98.2 | CT-Alpha | 1  | Grivo-1                 | Yes     | 73  | Sensitive    | 2.0 |
| P2098S | 93.0 | CT-Alpha | 2  | Hod                     | Yes     | 72  | Intermediate | 5.3 |
| I2115R | 98.2 | CT-Alpha | 1  | Iasi-1                  | Yes     | 44  | Intermediate | 5.0 |
| H2207Q | 98.1 | CT-Alpha | 1  | Ip-Lso-0                | Yes     | 55  | Intermediate | 7.5 |

<sup>a</sup> The first letter denotes the most common residue found among sequenced accessions.

<sup>b</sup> In alignment of 667 homomeric (eukaryotic) acetyl-CoA carboxylases.

<sup>c</sup> BC, Biotin carboxylase; BCCP, Biotin carboxyl carrier protein; CT, carboxyltransferase.

<sup>d</sup> Accessions with the same variant but a more sensitive or problematic seedling response are excluded to highlight the most tolerant responses observed with the variant present. A full list of accession responses is presented in Supplemental Table S3. Accessions with <30 seedlings scored were not evaluated in detail.

<sup>e</sup> The Sav-0 variant was uncovered by sequencing the ACC2 cDNA; whole genome sequence for this accession is not available.

<sup>f</sup> Intermediate responses: Aa-0; Hsm; Kyoto; Rag1-1; Ws-2.

<sup>g</sup> Intermediate responses: Boot-1; Col-0; Ga-0; Hi-0; Kn-0; Ler-1; NFA-8; Pi-0; Tscha-1; Van-0.

<sup>h</sup> Intermediate responses: Ber; CON-7; Dja-1; Est; Gy-0; Nie1-2; Pla-0; Sch1-7; Wa-1; WalHaesB4.

<sup>i</sup> Intermediate responses: Fei-0; Kin-0; Seattle-0; Sq-8.

<sup>j</sup> Intermediate responses: Boot-1; Col-0; Kn-0; Pi-0; Van-0.

<sup>k</sup> Intermediate responses: Dra3-1; Kni-1; Pna-17; Spr1-2.

330  
331**Supplemental Table S3.** Natural accessions analyzed and spectinomycin responses obtained.

| Accession <sup>a</sup> | ABRC Stock Number | Cold Treatment <sup>b</sup> | Seedlings Analyzed | Reported Country of Origin | Response Score | Spectinomycin Response Category | Initial Purpose <sup>c</sup> |
|------------------------|-------------------|-----------------------------|--------------------|----------------------------|----------------|---------------------------------|------------------------------|
| <i>acc2-1</i>          | Salk-148966C      |                             | 925                | Col-0 Accession            | 1.0            | Hypersensitive                  | KO                           |
| <i>tic20-iv-1</i>      | Sail-97-F10       |                             | 690                | Col-0 Accession            | 1.0            | Hypersensitive                  | KO                           |
| Aa-0                   | CS76428           | G                           | 27                 | Germany                    | 7.3            | Intermediate                    | SFS                          |
| Ag-0                   | CS76430           | G                           | 28                 | France                     | 7.6            | High Intermediate               | SFS                          |
| Aitba-1                | CS76649           | G                           | 53                 | Morocco                    | 2.8            | Sensitive                       | SFS                          |
| An-1                   | CS28015           |                             | 20                 | Belgium                    | 8.4            | Tolerant                        | FFS                          |
| Ang-0                  | CS76436           |                             | 28                 | Belgium                    | 8.1            | High Intermediate               | SFS                          |
| App1-14                | CS76668           |                             | 38                 | Sweden                     | 3.7            | Low Intermediate                | REV                          |
| App1-16                | CS76669           | V                           | 54                 | Sweden                     | 5.6            | Intermediate                    | REV                          |
| ARGE-1-15              | CS76672           |                             | 28                 | France                     | 7.2            | Intermediate                    | SFS                          |
| Ba-1                   | CS76441           | V                           | 22                 | United Kingdom             | 4.8            | Intermediate                    | REV                          |
| Baa-1                  | CS76442           | G                           | 28                 | Netherlands                | 7.8            | High Intermediate               | SFS                          |
| Balan-1                | CS76687           | V                           | 52                 | Russia                     | 6.2            | Intermediate                    | REV                          |
| Bay-0                  | CS28056           |                             | 68                 | Germany                    | 3.6            | Low Intermediate                | FFS                          |
| Bch-4                  | CS28060           |                             | 20                 | Germany                    | 3.2            | Sensitive                       | FFS                          |
| Bd-0                   | CS76445           | G                           | 79                 | Germany                    | 2.2            | Sensitive                       | TRP                          |
| Be-1                   | CS28063           |                             | 341                | Germany                    | 9.5            | Tolerant                        | FFS                          |
| Ber                    | CS76448           |                             | 25                 | Denmark                    | 4.4            | Intermediate                    | SFS                          |
| Berkeley               | CS28067           |                             | 20                 | USA (CA)                   | 3.7            | Low Intermediate                | FFS                          |
| Bik-1                  | CS76449           | G                           | 28                 | Lebanon                    | 3.8            | Low Intermediate                | SFS                          |
| Bil-5                  | CS76709           | V                           | 46                 | Sweden                     | 6.0            | Intermediate                    | PNL                          |
| Bl-1                   | CS76450           |                             | 49                 | Italy                      | 2.4            | Sensitive                       | SFS                          |
| Bla-1/12               | CS28086           |                             | 20                 | Spain                      | 3.9            | Low Intermediate                | FFS                          |
| Blh-1                  | CS28089           |                             | 71                 | Czech Republic             | 1.3            | Sensitive                       | PNL                          |
| Blh-1(2)               | CS76098           |                             | 20                 | Czech Republic             | 7.5            | High Intermediate               | PNL                          |
| Boot-1                 | CS76452           | G                           | 26                 | United Kingdom             | 5.2            | Intermediate                    | SFS                          |
| Bor-4                  | CS76454           | G                           | 26                 | Czech Republic             | 7.4            | Intermediate                    | SFS                          |
| Borky*                 | CS76453           |                             | 53                 | Czech Republic             | 6.8            | Intermediate                    | REV                          |
| BRI-2*                 | CS76725           |                             | 31                 | France                     | 5.1            | Intermediate                    | REV                          |
| Bs-1                   | CS76456           |                             | 28                 | Switzerland                | 6.4            | Intermediate                    | SFS                          |
| Bsch-0                 | CS76457           |                             | 24                 | Germany                    | 7.2            | Intermediate                    | TRP                          |
| Buckhorn Pass          | CS76733           | V                           | 29                 | USA (CA)                   | 1.7            | Sensitive                       | REV                          |
| Bur-0                  | CS76734           |                             | 70                 | Ireland                    | 2.3            | Sensitive                       | SFS                          |
| C24*                   | CS28127           |                             | 73                 | Uncertain                  | 7.9            | High Intermediate               | FFS                          |
| Can-0*                 | CS76740           |                             | 96                 | Spain                      | 4.7            | Intermediate                    | SFS                          |
| CATS-6*                | CS76760           | G                           | 47                 | France                     | 6.4            | Intermediate                    | PNL                          |
| Chat-1                 | CS76463           | G                           | 23                 | France                     | 9.7            | Tolerant                        | SFS                          |

|               |         |   |     |                    |     |                   |     |
|---------------|---------|---|-----|--------------------|-----|-------------------|-----|
| Chi-0         | CS76464 |   | 75  | Russia             | 5.1 | Intermediate      | TRP |
| CIBC-5        | CS76465 |   | 27  | United Kingdom     | 4.4 | Intermediate      | SFS |
| Co-1          | CS76468 |   | 28  | Portugal           | 7.3 | Intermediate      | SFS |
| Col-0         | Lab     |   | 287 | From George Redei  | 5.6 | Intermediate      | FFS |
| Com-1         | CS76469 |   | 32  | France             | 5.3 | Intermediate      | SFS |
| CON-7         | CS76781 |   | 28  | France             | 6.8 | Intermediate      | SFS |
| Cvi-0         | CS28197 |   | 20  | Cape Verde Islands | 5.3 | Intermediate      | FFS |
| CYR           | CS76790 |   | 76  | France             | 7.8 | High Intermediate | SFS |
| Da(1)-12      | CS76470 |   | 24  | Czech Republic     | 6.0 | Intermediate      | SFS |
| Db-1          | CS28203 |   | 75  | Germany            | 7.2 | Intermediate      | FFS |
| Del-10        | CS76397 | G | 24  | Yugoslavia         | 4.2 | Intermediate      | SFS |
| Dem-4         | CS76794 | V | 28  | USA                | 1.7 | Sensitive         | REV |
| Di-G          | CS76472 |   | 82  | France             | 2.5 | Sensitive         | TRP |
| Dja-1         | CS76473 | G | 52  | Kyrgyzstan         | 4.6 | Intermediate      | SFS |
| Dog-4         | CS76386 | V | 53  | Turkey             | 3.7 | Low Intermediate  | TRP |
| Dra3-1        | CS76811 | V | 56  | Sweden             | 5.3 | Intermediate      | REV |
| Draha2        | CS76812 |   | 27  | Czech Republic     | 6.7 | Intermediate      | SFS |
| Durh-1        | CS76477 |   | 17  | United Kingdom     | 4.7 | Intermediate      | SFS |
| Ema-1         | CS76480 | G | 41  | United Kingdom     | 8.2 | Tolerant          | SFS |
| En-1          | CS28233 |   | 20  | Germany            | 8.3 | High Intermediate | FFS |
| En-D          | CS28230 |   | 20  | Ukraine            | 8.5 | Tolerant          | FFS |
| Erg2-6        | CS76845 |   | 27  | Germany            | 8.3 | Tolerant          | SFS |
| Eri-1         | CS28240 |   | 20  | Sweden             | 6.0 | Intermediate      | FFS |
| Est           | CS76485 |   | 27  | Germany            | 5.0 | Intermediate      | SFS |
| Est-0/1       | CS28243 |   | 20  | Russia             | 2.4 | Sensitive         | FFS |
| Etna-2        | CS76487 | V | 111 | Italy              | 1.9 | Sensitive         | SFS |
| Faneromnemi-3 | CS76853 |   | 27  | Greece             | 2.4 | Sensitive         | SFS |
| Fei-0         | CS28250 |   | 20  | Portugal           | 4.9 | Intermediate      | FFS |
| Fell1-10      | CS76855 |   | 27  | Germany            | 8.6 | Tolerant          | TRP |
| Filet-1       | CS76858 |   | 27  | Italy              | 7.6 | Intermediate      | SFS |
| Ga-0          | CS76490 |   | 28  | Germany            | 7.0 | Intermediate      | SFS |
| Gd-1          | CS28275 |   | 20  | Germany            | 7.6 | Intermediate      | FFS |
| Geg-14        | CS76876 |   | 28  | Armenia            | 5.5 | Intermediate      | SFS |
| Gel-1         | CS76492 |   | 28  | Netherlands        | 4.8 | Intermediate      | SFS |
| Giffo-1*      | CS76878 |   | 25  | Italy              | 8.0 | High Intermediate | REV |
| Gifu-2*       | CS76494 |   | 78  | Japan              | 1.3 | Sensitive         | SFS |
| Gn-1          | CS76880 |   | 83  | Germany            | 1.1 | Hypersensitive    | PNL |
| Gn2-3*        | CS76881 |   | 191 | Germany            | 1.1 | Hypersensitive    | SFS |
| Go-0          | CS28282 |   | 58  | Germany            | 3.1 | Sensitive         | FFS |
| Gr-1 (Graz)   | CS76496 |   | 26  | Austria            | 4.8 | Intermediate      | SFS |
| Gradi-1.9645  | CS76887 |   | 8   | Croatia            | 4.0 | Low Intermediate  | PNL |
| Gre-0         | CS76497 |   | 48  | USA (MI)           | 1.4 | Sensitive         | REV |

|            |         |     |     |                |     |                  |     |
|------------|---------|-----|-----|----------------|-----|------------------|-----|
| Grivo-1    | CS76888 | G/V | 73  | Bulgaria       | 2.0 | Sensitive        | REV |
| Gu-0       | CS28331 |     | 20  | Germany        | 4.6 | Intermediate     | FFS |
| Gy-0       | CS76499 |     | 26  | France         | 4.6 | Intermediate     | SFS |
| Ha-HBT1-2  | CS76898 |     | 28  | Germany        | 9.1 | Tolerant         | SFS |
| Ha-HBT2-10 | CS76899 |     | 27  | Germany        | 5.8 | Intermediate     | SFS |
| Ha-S-B     | CS76903 |     | 28  | Germany        | 4.6 | Intermediate     | SFS |
| Hi-0       | CS28346 |     | 20  | Netherlands    | 5.7 | Intermediate     | FFS |
| Hn-0       | CS76513 |     | 28  | Germany        | 5.7 | Intermediate     | TRP |
| Hod        | CS76924 |     | 72  | Czech Republic | 5.3 | Intermediate     | PNL |
| Hof-1      | CS76925 | G   | 56  | Germany        | 5.9 | Intermediate     | PNL |
| Hovdala-2  | CS76937 | V   | 56  | Sweden         | 4.5 | Intermediate     | PNL |
| HR-10      | CS28355 |     | 20  | United Kingdom | 2.4 | Sensitive        | FFS |
| Hs-0       | CS76515 |     | 25  | Germany        | 5.2 | Intermediate     | SFS |
| HSm        | CS76941 |     | 24  | Czech Republic | 6.1 | Intermediate     | SFS |
| Iasi-1     | CS76944 |     | 44  | Romania        | 5.0 | Intermediate     | REV |
| In-0       | CS76516 |     | 84  | Austria        | 4.8 | Intermediate     | SFS |
| IP-Alo-0   | CS76662 | G   | 51  | Portugal       | 1.1 | Hypersensitive   | PNL |
| IP-Ber-0   | CS78887 | G   | 49  | Spain          | 1.3 | Sensitive        | PNL |
| IP-Cor-0   | CS76782 | G/V | 8   | Spain          | 2.6 | Sensitive        | REV |
| IP-Cum-1   | CS76787 | G   | 129 | Spain          | 2.3 | Sensitive        | TRP |
| IP-Gua-1   | CS76894 | G   | 81  | Spain          | 6.3 | Intermediate     | REV |
| Ip-Hom-4   | CS76929 | G/V | 94  | Spain          | 4.5 | Intermediate     | REV |
| IP-Lso-0   | CS77055 | G   | 55  | Spain          | 7.5 | Intermediate     | REV |
| IP-Pal-0   | CS77159 | G   | 51  | Spain          | 6.1 | Intermediate     | REV |
| IP-Ren-6   | CS77212 | G   | 42  | Spain          | 2.8 | Sensitive        | PNL |
| IP-Tor-1   | CS77378 | G   | 46  | Spain          | 4.1 | Low Intermediate | REV |
| IP-Vin-0   | CS78846 | G   | 33  | Spain          | 1.2 | Hypersensitive   | PNL |
| IP-Vis-0   | CS78848 | G   | 47  | Spain          | 3.3 | Low Intermediate | REV |
| IP-Voz-0   | CS78849 | G   | 72  | Spain          | 5.5 | Intermediate     | PNL |
| Is-0       | CS76517 |     | 28  | Germany        | 7.2 | Intermediate     | TRP |
| Jl-3       | CS28369 |     | 352 | Czech Republic | 9.4 | Tolerant         | FFS |
| Jm-0       | CS76520 |     | 27  | Czech Republic | 5.0 | Intermediate     | SFS |
| Kar-1      | CS76522 | G   | 28  | Kyrgyzstan     | 5.2 | Intermediate     | SFS |
| Karag-2    | CS76961 |     | 28  | Russia         | 7.1 | Intermediate     | SFS |
| Kas-2      | CS76523 | G   | 26  | India          | 6.1 | Intermediate     | SFS |
| Kb-0       | CS76524 |     | 73  | Germany        | 1.4 | Sensitive        | PNL |
| Kil-0      | CS76526 |     | 28  | United Kingdom | 4.0 | Low Intermediate | SFS |
| Kin-0      | CS76527 |     | 23  | USA (MI)       | 6.0 | Intermediate     | SFS |
| Kl-1       | CS28390 |     | 20  | Germany        | 9.0 | Tolerant         | FFS |
| Kl-5       | CS76528 |     | 76  | Germany        | 1.1 | Hypersensitive   | PNL |
| Kn-0       | CS28395 |     | 19  | Lithuania      | 5.9 | Intermediate     | FFS |
| Kni-1      | CS76970 | V   | 56  | Sweden         | 7.2 | Intermediate     | REV |

|            |         |   |     |                |     |                   |      |
|------------|---------|---|-----|----------------|-----|-------------------|------|
| Knjas-1    | CS76971 |   | 22  | Serbia         | 3.4 | Low Intermediate  | SFS  |
| Knox-18    | CS76530 |   | 80  | USA (IN)       | 1.1 | Hypersensitive    | SFS  |
| Koch-1     | CS76396 |   | 25  | Ukraine        | 6.1 | Intermediate      | SFS  |
| Kolar-1    | CS76974 |   | 27  | Bulgaria       | 4.5 | Intermediate      | SFS  |
| Koln       | CS76976 |   | 28  | Germany        | 6.6 | Intermediate      | SFS  |
| Kolyv-6    | CS76980 |   | 27  | Russia         | 4.0 | Intermediate      | SFS  |
| Kondara    | CS76532 | G | 28  | Tajikistan     | 6.7 | Intermediate      | SFS  |
| Koren-1*   | CS76983 | G | 0   | Bulgaria       |     | Not Tested        | ACC1 |
| K-oze-1    | CS76957 |   | 28  | Russia         | 4.8 | Intermediate      | SFS  |
| Kyoto      | CS76535 |   | 28  | Japan          | 6.7 | Intermediate      | SFS  |
| Kz-1       | CS28427 |   | 20  | Kazakhstan     | 4.9 | Intermediate      | FFS  |
| La-0       | CS76538 |   | 106 | Germany        | 2.0 | Sensitive         | SFS  |
| LDV-18     | CS77013 |   | 21  | France         | 3.7 | Low Intermediate  | SFS  |
| Ler-1      | CS28449 |   | 20  | Germany        | 4.5 | Intermediate      | FFS  |
| Leska-1-44 | CS77030 | V | 52  | Bulgaria       | 5.4 | Intermediate      | REV  |
| Lip-0*     | CS76542 |   | 53  | Poland         | 6.2 | Intermediate      | SFS  |
| Litva      | CS76543 |   | 27  | Lithuania      | 3.9 | Intermediate      | SFS  |
| Lm-2       | CS28473 |   | 70  | France         | 8.3 | Tolerant          | FFS  |
| Lo-1       | CS28474 |   | 20  | Germany        | 7.5 | Intermediate      | FFS  |
| Lu3-30     | CS77057 |   | 54  | Germany        | 1.1 | Hypersensitive    | PNL  |
| Lu4-2      | CS77058 |   | 55  | Germany        | 1.3 | Hypersensitive    | PNL  |
| Mdn-1*     | CS77077 |   | 43  | USA            | 2.9 | Sensitive         | REV  |
| Melni-2    | CS77080 | G | 0   | Bulgaria       |     | Not Tested        | ACC1 |
| Mer-6      | CS76414 | G | 28  | Spain          | 4.5 | Low Intermediate  | SFS  |
| Mh-0       | CS76550 |   | 28  | Poland         | 6.2 | Intermediate      | SFS  |
| Mh-1       | CS28493 |   | 20  | Poland         | 9.3 | Tolerant          | FFS  |
| MIC-31     | CS77082 |   | 49  | USA (MI)       | 2.1 | Sensitive         | REV  |
| MNF-Che-2  | CS77096 |   | 53  | USA            | 4.3 | Intermediate      | REV  |
| MNF-Jac-12 | CS77097 |   | 33  | USA (MI)       | 2.5 | Sensitive         | REV  |
| MNF-Pot-21 | CS77099 |   | 50  | USA            | 1.4 | Hypersensitive    | REV  |
| MNF-Pot-75 | CS77100 |   | 32  | USA            | 2.2 | Sensitive         | REV  |
| Mt-0       | CS28502 |   | 20  | Libya          | 8.4 | Tolerant          | FFS  |
| Mv-0       | CS76556 |   | 56  | USA (MA)       | 1.1 | Hypersensitive    | REV  |
| Mz-0       | CS28506 |   | 20  | Germany        | 9.1 | Tolerant          | FFS  |
| Nc-1       | CS76559 |   | 20  | France         | 7.3 | High Intermediate | SFS  |
| NC-6       | CS77124 |   | 54  | USA (NC)       | 1.6 | Sensitive         | REV  |
| Nd-0/1     | CS28528 |   | 19  | Germany        | 4.6 | Intermediate      | FFS  |
| Nemrut-1   | CS76398 | V | 75  | Turkey         | 4.2 | Intermediate      | TRP  |
| Neo-6      | CS76560 |   | 27  | Tajikistan     | 4.5 | Intermediate      | SFS  |
| Nfa-8      | CS28532 |   | 20  | United Kingdom | 7.1 | Intermediate      | FFS  |
| Nie 1-2    | CS76402 |   | 235 | Germany        | 5.1 | Intermediate      | FFS  |
| Nok-3      | CS76562 |   | 26  | Netherlands    | 4.5 | Intermediate      | SFS  |

|             |         |   |     |                    |     |                   |      |
|-------------|---------|---|-----|--------------------|-----|-------------------|------|
| "Nossen"    | RIKEN   |   | 571 | Uncertain          | 2.3 | Sensitive         | FFS  |
| Np-0        | CS76563 |   | 28  | Germany            | 4.8 | Intermediate      | SFS  |
| Nw-0        | CS76564 |   | 28  | Germany            | 7.0 | Intermediate      | TRP  |
| Nz-1        | CS28578 |   | 20  | New Zealand        | 6.4 | High Intermediate | FFS  |
| Ob-0        | CS76566 |   | 74  | Germany            | 1.2 | Hypersensitive    | PNL  |
| Old-1       | CS76567 |   | 75  | Germany            | 1.2 | Hypersensitive    | PNL  |
| Olympia-2*  | CS77144 |   | 33  | Greece             | 1.9 | Sensitive         | PNL  |
| Oy-0        | CS28591 |   | 229 | Norway             | 2.1 | Sensitive         | FFS  |
| Pa-2        | CS28595 |   | 20  | Italy              | 2.5 | Sensitive         | FFS  |
| Ped-0       | CS76415 | V | 56  | Spain              | 3.1 | Sensitive         | REV  |
| Per-1       | CS76571 |   | 27  | Russia             | 2.4 | Sensitive         | SFS  |
| Petergof    | CS77170 | G | 0   | Russia             |     | Not Tested        | ACC1 |
| Pi-0        | CS76572 |   | 28  | Austria            | 6.9 | Intermediate      | SFS  |
| Pi-2        | CS28639 |   | 40  | Austria            | 9.0 | Tolerant          | FFS  |
| Pla-0       | CS76573 |   | 27  | Spain              | 4.3 | Intermediate      | SFS  |
| Pna-10*     | CS76574 |   | 112 | USA (MI)           | 1.4 | Sensitive         | SFS  |
| Pna-17      | CS76575 | V | 52  | USA (MI)           | 6.4 | Intermediate      | REV  |
| Pog-0       | CS76576 | G | 60  | Canada             | 8.6 | Tolerant          | SFS  |
| Pro-0       | CS76577 | G | 28  | Spain              | 6.0 | Intermediate      | SFS  |
| PT2.21      | CS77191 |   | 55  | USA (PT)           | 1.5 | Sensitive         | REV  |
| Pu2-23      | CS76579 | G | 23  | Czech Republic     | 5.4 | Intermediate      | SFS  |
| Qar-8a      | CS76581 | V | 100 | Lebanon            | 2.4 | Sensitive         | PNL  |
| Qui-0       | CS76417 |   | 18  | North Africa/Spain | 2.5 | Sensitive         | FFS  |
| Ra-0        | CS28665 |   | 20  | France             | 3.2 | Low Intermediate  | FFS  |
| Ragl-1      | CS76583 |   | 27  | United Kingdom     | 4.3 | Intermediate      | SFS  |
| Rennes-1    | CS76586 |   | 44  | France             | 3.9 | Low Intermediate  | SFS  |
| Rev-2       | CS77215 | V | 53  | Sweden             | 6.6 | Intermediate      | PNL  |
| RLD-2       | CS28688 |   | 19  | Russia             | 4.1 | Intermediate      | FFS  |
| Rmx-A02     | CS76589 |   | 36  | USA (MI)           | 2.1 | Sensitive         | REV  |
| Rmx-A180    | CS77218 |   | 42  | USA (MI)           | 1.8 | Sensitive         | REV  |
| RRS-10      | CS76592 |   | 81  | USA (IN)           | 1.3 | Sensitive         | SFS  |
| RRS-7       | CS76593 |   | 28  | USA (IN)           | 4.7 | Intermediate      | TRP  |
| Rubexhnoe-1 | CS76594 | G | 27  | Ukraine            | 6.0 | Intermediate      | SFS  |
| Sapporo-0   | CS28724 |   | 16  | Japan              | 3.2 | Low Intermediate  | FFS  |
| Sav-0       | CS28725 |   | 275 | Czech Republic     | 1.2 | Hypersensitive    | FFS  |
| Schl-7      | CS77240 |   | 70  | Germany            | 4.8 | Intermediate      | REV  |
| Se-0        | CS76597 | G | 28  | Spain              | 7.3 | Intermediate      | SFS  |
| Seattle-0   | CS76598 |   | 28  | USA (WA)           | 6.1 | Intermediate      | SFS  |
| Sei-0       | CS76599 |   | 56  | Italy              | 6.9 | Intermediate      | SFS  |
| Sha*        | CS28736 |   | 74  | Tajikistan         | 8.1 | High Intermediate | FFS  |
| Sha(2)      | CS76382 |   | 20  | Tajikistan         | 7.6 | Intermediate      | FFS  |
| Si-0        | CS76601 |   | 83  | Germany            | 8.2 | High Intermediate | SFS  |

|             |         |     |     |                |     |                   |     |
|-------------|---------|-----|-----|----------------|-----|-------------------|-----|
| Slavi-1     | CS76419 | G   | 27  | Bulgaria       | 7.6 | Intermediate      | SFS |
| SLSP-31     | CS77254 |     | 53  | USA (MI)       | 1.4 | Sensitive         | REV |
| SLSP-35*    | CS77255 |     | 50  | USA (MI)       | 6.2 | Intermediate      | REV |
| Smolj-1     | CS77256 | G   | 51  | Bulgaria       | 4.5 | Intermediate      | REV |
| Sorbo       | CS76602 |     | 28  | Tajikistan     | 8.1 | Tolerant          | SFS |
| Spr1-2      | CS77261 | V   | 47  | Sweden         | 6.0 | Intermediate      | REV |
| Spro-1      | CS77263 | V   | 52  | Sweden         | 5.1 | Low Intermediate  | PNL |
| Spro-2      | CS77264 | G/V | 80  | Sweden         | 1.3 | Sensitive         | PNL |
| Sq-8        | CS76604 |     | 26  | United Kingdom | 6.7 | Intermediate      | SFS |
| Star-8      | CS76400 |     | 27  | Germany        | 4.7 | Intermediate      | TRP |
| Ste-2       | CS77274 | G/V | 83  | Sweden         | 1.1 | Hypersensitive    | PNL |
| Ste-3       | CS77275 | G/V | 82  | Sweden         | 1.0 | Hypersensitive    | PNL |
| Stw-0       | CS76605 |     | 28  | Russia         | 7.2 | Intermediate      | SFS |
| T1020       | CS77289 | V   | 49  | Sweden         | 6.4 | Intermediate      | PNL |
| Ta-0        | CS76608 |     | 28  | Czech Republic | 7.0 | Intermediate      | SFS |
| TAMM-2      | CS76610 | V   | 54  | Finland        | 2.8 | Sensitive         | PNL |
| Tha-1       | CS76611 |     | 84  | Netherlands    | 3.4 | Low Intermediate  | SFS |
| Tol-0       | CS76614 |     | 73  | USA (OH)       | 2.0 | Sensitive         | SFS |
| Ts-1        | CS76615 |     | 70  | Spain          | 2.5 | Sensitive         | REV |
| Tscha-1     | CS76616 |     | 28  | Austria        | 5.4 | Intermediate      | SFS |
| Tsu-0       | CS28780 |     | 490 | Japan          | 8.8 | Tolerant          | FFS |
| Tu-0        | CS76617 |     | 84  | Italy          | 9.4 | Tolerant          | SFS |
| Tul-0       | CS76618 |     | 81  | USA (MI)       | 1.7 | Sensitive         | SFS |
| Ty-0        | CS76619 |     | 28  | United Kingdom | 3.2 | Sensitive         | SFS |
| Uk-1        | CS76620 | G   | 27  | Germany        | 8.3 | High Intermediate | SFS |
| UKSWO6-333* | CS78813 |     | 15  | United Kingdom | 5.1 | Intermediate      | REV |
| Ulies-1*    | CS78815 |     | 109 | Romania        | 3.9 | Low Intermediate  | REV |
| Ullapool-8* | CS78821 | G   | 51  | United Kingdom | 6.3 | Intermediate      | PNL |
| Uod-1       | CS76621 |     | 78  | Austria        | 8.5 | Tolerant          | SFS |
| Utrecht     | CS76622 |     | 28  | Netherlands    | 3.6 | Low Intermediate  | SFS |
| Vaar2-6     | CS78831 | V   | 54  | Sweden         | 6.7 | Intermediate      | PNL |
| Van-0       | CS28796 |     | 20  | Canada         | 5.4 | Intermediate      | FFS |
| Vimmerby    | CS78845 | G/V | 67  | Sweden         | 1.0 | Hypersensitive    | PNL |
| Wa-1        | CS76626 |     | 40  | Poland         | 5.3 | Intermediate      | REV |
| WalHaesB4   | CS76408 | G   | 39  | Germany        | 5.6 | Intermediate      | REV |
| WAR         | CS78853 |     | 39  | USA (RI)       | 3.7 | Low Intermediate  | REV |
| Wei-0       | CS28816 |     | 79  | Switzerland    | 9.0 | Tolerant          | FFS |
| Wil-1       | CS28819 |     | 20  | Russia         | 2.4 | Sensitive         | FFS |
| WI-0        | CS76630 | G   | 79  | Germany        | 1.4 | Sensitive         | PNL |
| Ws-2        | CS28828 |     | 20  | Russia         | 5.3 | Intermediate      | FFS |
| Yeg-1       | CS76394 |     | 20  | Armenia        | 7.8 | Intermediate      | FFS |
| Yo-0        | CS76633 | V   | 51  | USA (CA)       | 4.5 | Low Intermediate  | REV |



|       |         |   |    |                |     |              |     |
|-------|---------|---|----|----------------|-----|--------------|-----|
| Zal-1 | CS76634 | G | 28 | Kyrgyzstan     | 6.5 | Intermediate | SFS |
| Zdr-1 | CS76635 |   | 28 | Czech Republic | 5.8 | Intermediate | SFS |
| Zu-1  | CS28847 |   | 20 | Switzerland    | 6.6 | Intermediate | FFS |

<sup>a</sup> Asterisk: Variants of interest in these accessions were not confirmed by Sanger sequencing (Refer to Supplemental Table S8).

<sup>b</sup> Extended treatment at 4°C used for germination (G) of seeds on plates, or vernalization (V) of plants at the rosette stage.

<sup>c</sup> KO, Knockout mutant; FFS, First forward genetic screen; SFS, Second forward genetic screen; PNL, Putative null allele; REV, Reverse genetic screen; TRP, Transit peptide variant.

333 **Supplemental Table S4.** Terminal phenotypes and allele strengths of *ACC1* nonsense and  
 334 missense mutants.

335

| <b>Feature Evaluated</b>                                                                                                                                                              | <b><i>emb22</i></b> | <b><i>pas3-1</i></b> | <b><i>pas3-2</i></b>                      |
|---------------------------------------------------------------------------------------------------------------------------------------------------------------------------------------|---------------------|----------------------|-------------------------------------------|
| Mutation                                                                                                                                                                              | Nonsense            | Missense             | Missense                                  |
| Terminal Embryo Phenotype                                                                                                                                                             | Green Blimp         | Green Blimp          | Cotyledon Initials;<br>Expanded Hypocotyl |
| Seeds Screened <sup>a</sup>                                                                                                                                                           | 444                 | 507                  | 435                                       |
| Mutant Seeds                                                                                                                                                                          | 22.7 %              | 21.3 %               | 23.5 %                                    |
| Mutant Embryos Measured                                                                                                                                                               | 101                 | 108                  | 102                                       |
| Embryo Length <sup>b</sup>                                                                                                                                                            | 300 ± 50 µm         | 325 ± 40 µm          | 375 ± 45 µm                               |
| Mutant Seedlings Screened <sup>c</sup>                                                                                                                                                | 33                  | 59                   | Not Tested                                |
| Seedling Length <sup>b</sup>                                                                                                                                                          | 0.7 ± 0.2 mm        | 3.7 ± 2.0 mm         | Not Tested                                |
| Dark Green Seedlings                                                                                                                                                                  | 3.0 %               | 76.3 %               | Not Tested                                |
| Brown Seedlings                                                                                                                                                                       | 72.8 %              | 0.0 %                | Not Tested                                |
| Terminal Seedling Phenotype                                                                                                                                                           | Minimal Growth      | Extensive Growth     | Not Tested                                |
| Allele Strength                                                                                                                                                                       | Null                | Strong               | Moderate                                  |
| <sup>a</sup> Seeds were examined in siliques of selfed heterozygotes.<br><sup>b</sup> Mean length ± S.D.<br><sup>c</sup> Seedlings were evaluated after 5 weeks of growth in culture. |                     |                      |                                           |

336

337

338 **Supplemental Table S5.** Spectinomycin responses of F2 seedlings from crosses between sensitive accessions and  
 339 informative knockout mutants.

340

| Accession Parent     | Knockout Parent | Seedlings Classified | Phenotype Score | Distribution of F2 Seedling Phenotypes (%) |             |             |              |             |             |             |
|----------------------|-----------------|----------------------|-----------------|--------------------------------------------|-------------|-------------|--------------|-------------|-------------|-------------|
|                      |                 |                      |                 | Sensitive                                  |             |             | Intermediate |             |             | Tolerant    |
|                      |                 |                      |                 | 1                                          | 2           | 3           | 5            | 6           | 7           | 9           |
| "Gn2-3"              | <i>acc2</i>     | 82                   | 1.0             | <b>97.6</b>                                | 2.4         |             |              |             |             |             |
| Sav-0                | <i>acc2</i>     | 163                  | 1.0             | <b>99.4</b>                                | 0.6         |             |              |             |             |             |
| Sav-0                | "Nossen"        | 184                  | 1.2             | <b>87.5</b>                                | 4.9         | 7.1         |              | 0.5         |             |             |
| Knox-18 <sup>b</sup> | <i>acc2</i>     | 127                  | 1.0             | <b>96.1</b>                                | 3.9         |             |              |             |             |             |
| Tul-0 <sup>b</sup>   | <i>acc2</i>     | 135                  | 1.1             | <b>90.4</b>                                | 8.9         | 0.7         |              |             |             |             |
| Pna-10 <sup>b</sup>  | <i>acc2</i>     | 165                  | 1.0             | <b>97.6</b>                                | 2.4         |             |              |             |             |             |
|                      |                 |                      |                 |                                            |             |             |              |             |             |             |
| "Gn2-3"              | <i>tic20-iv</i> | 156                  | 3.6             | <b>39.1</b>                                | 5.1         | 5.1         | <b>30.8</b>  | 1.9         | <b>16.7</b> | 1.3         |
| Sav-0                | <i>tic20-iv</i> | 152                  | 3.2             | <b>31.6</b>                                | 7.9         | <b>25.7</b> | <b>26.3</b>  | 0.7         | 7.8         |             |
| Knox-18 <sup>b</sup> | <i>tic20-iv</i> | 124                  | 4.0             | <b>46.0</b>                                | 4.8         |             | <b>12.1</b>  | 4.0         | <b>21.8</b> | <b>11.3</b> |
| Tul-0 <sup>b</sup>   | <i>tic20-iv</i> | 138                  | 3.8             | <b>38.5</b>                                | <b>10.9</b> |             | <b>15.2</b>  | <b>10.1</b> | <b>21.0</b> | 4.3         |
|                      |                 |                      |                 |                                            |             |             |              |             |             |             |
| Aitba-1              | <i>acc2</i>     | 325                  | 2.2             | <b>42.5</b>                                | <b>28.6</b> | <b>17.2</b> | 5.5          | 3.1         | 3.1         |             |
| Aitba-1              | <i>tic20-iv</i> | 124                  | 3.7             | <b>29.9</b>                                | <b>11.3</b> | <b>15.3</b> | <b>21.0</b>  | 4.8         | <b>13.7</b> | 4.0         |
|                      |                 |                      |                 |                                            |             |             |              |             |             |             |
| La-0                 | <i>acc2</i>     | 152                  | 2.6             | <b>23.7</b>                                | <b>27.6</b> | <b>35.5</b> | 5.9          | 6.6         | 0.7         |             |
| La-0                 | <i>tic20-iv</i> | 154                  | 2.5             | <b>25.3</b>                                | <b>29.2</b> | <b>35.1</b> | 5.9          | 4.5         |             |             |

<sup>a</sup> Refer to Figure 1 for examples of sensitive, intermediate, and tolerant seedling phenotypes. Red, Most common phenotypes.

<sup>b</sup> Part of the Knox-18 group of sensitive accessions with shared variants of interest.

341 **Supplemental Table S6.** ACC2 variants in the Sav-0 accession that differ from the consensus among sequenced accessions.  
 342

| Variant <sup>a</sup> | Conservation (%) <sup>b</sup> | Protein Domain <sup>c</sup> | 1001 Genomes Accessions with Predicted Variant | Accessions Evaluated on Spectinomycin <sup>d</sup> | Variant Confirmed | Seedlings Classified | Spectinomycin Response |       |
|----------------------|-------------------------------|-----------------------------|------------------------------------------------|----------------------------------------------------|-------------------|----------------------|------------------------|-------|
|                      |                               |                             |                                                |                                                    |                   |                      | Category               | Score |
| A18T                 | Low                           | TP                          | 39                                             | Multiple <sup>e</sup>                              | Assumed           | 231                  | Intermediate           | 5.0   |
| S66F                 | Low                           | TP                          | 57                                             | Giffo-1                                            | Not Needed        | 25                   | High Intermediate      | 8.0   |
|                      |                               |                             |                                                | Fell1-10; JI-3                                     |                   | 379                  | Tolerant               | 9.3   |
| G135E                | 95.7                          | (BC)                        | 0                                              | Sav-0 <sup>f</sup>                                 | Yes               | 275                  | Hypersensitive         | 1.2   |
| M445T                | Low                           | BC                          | 189                                            | Multiple <sup>g</sup>                              | Assumed           | 1063                 | Tolerant               | 9.0   |
| V472I                | 83.7                          | BC                          | 51                                             | Nz-1; Uk-1                                         | Not Tested        | 47                   | High Intermediate      | 7.5   |
|                      |                               |                             |                                                | Mt-0; Mz-0                                         |                   | 40                   | Tolerant               | 8.8   |
| D521N                | Low                           | BC                          | 51                                             | Nz-1; Uk-1                                         | Not Needed        | 47                   | High Intermediate      | 7.5   |
|                      |                               |                             |                                                | Mt-0; Mz-0                                         |                   | 40                   | Tolerant               | 8.8   |
| S1758L               | Low                           | CT                          | 192                                            | Multiple <sup>g</sup>                              | Assumed           | 1063                 | Tolerant               | 9.0   |
| S2230L               | Low                           |                             | 48                                             | Nz-1; Uk-1                                         | Not Needed        | 47                   | High Intermediate      | 7.5   |
|                      |                               |                             |                                                | Mt-0                                               |                   | 20                   | Tolerant               | 8.4   |
| T2284R               | Low                           |                             | 60                                             | Nz-1; Uk-1                                         | Not Needed        | 47                   | High Intermediate      | 7.5   |
|                      |                               |                             |                                                | Lm-2; Mt-0; Mz-0                                   |                   | 110                  | Tolerant               | 8.5   |

<sup>a</sup> The first letter denotes the most common residue found among 855 sequenced accessions. Six variants (E87D; A376V; S725N; M800I; S1384T; D1766G) where the Sav-0 sequence differs from the Col-0 reference but not the accession consensus are excluded.

<sup>b</sup> In alignment of 667 homomeric (eukaryotic) acetyl-CoA carboxylases.

<sup>c</sup> TP, Transit Peptide; BC, Biotin carboxylase; CT, carboxyltransferase.

<sup>d</sup> Accessions with the same variant but a more sensitive or problematic seedling response are excluded to highlight the most tolerant responses observed with the variant present. A full list of accession responses is presented in Supplemental Table S3. Accessions with <30 seedlings scored were not evaluated in detail.

<sup>e</sup> Intermediate responses: Durh-1; Hn-0; Hovdala-2; Ler-1; Litva; Nw-0; RRS-7; Star-8.

<sup>f</sup> The Sav-0 variant was uncovered by sequencing the ACC2 cDNA; whole genome sequence for this accession is not available.

<sup>g</sup> Tolerant responses: Fell1-10; JI-3; Lm-2; Mt-0; Mz-0; Tsu-0; Tu-0.

343 **Supplemental Table S7.** Informative variants that alter conserved residues or disrupt protein structure in eukaryotic, homomeric acetyl-CoA carboxylases.

344

| Residue (ACC2) | Variant (ACC2) <sup>a</sup> | Variant Type  | Organism    | Variant Impact <sup>b</sup> | Allele Strength | Locus | Domain          | Conservation (%) |             |               | Genotype               | Source AA Residue | Reference              | Additional Notes                                                      |
|----------------|-----------------------------|---------------|-------------|-----------------------------|-----------------|-------|-----------------|------------------|-------------|---------------|------------------------|-------------------|------------------------|-----------------------------------------------------------------------|
|                |                             |               |             |                             |                 |       |                 | MUSCLE (667)     | Plant (139) | Original (20) |                        |                   |                        |                                                                       |
| 135            | G135E                       | Missense      | Arabidopsis | LD                          | Strong          | ACC2  | (BC)            | 95.7             | 100.0       | 95            | Sav-0                  | Same              | This Report            | Unique to Sav-0 Accession                                             |
| 153            | K153E                       | Site Directed | Yeast       | D                           | Strong          | ACC1  | Dimer Interface | 96.9             | 100.0       | 100           | K73E                   | 73                | Wei and Tong (2015)    | Loss of Enzyme Activity <i>in vitro</i>                               |
| 156            | R156E                       | Site Directed | Yeast       | D                           | Strong          | ACC1  | Dimer Interface | 93.6             | 99.3        | 100           | R76E                   | 76                | Wei and Tong (2015)    | Loss of Enzyme Activity <i>in vitro</i> ; Soraphen A Interaction Site |
| 188            | E188K                       | Missense      | Arabidopsis | D                           | Weak            | ACC1  | BC              | 78.0             | 99.3        | 90            | <i>gsd1</i>            | 86                | Lü et al. (2011)       | Vegetative Phenotype                                                  |
| 193            | A193V                       | Missense      | Arabidopsis | ND                          | Normal          | ACC1  | BC              | 98.4             | 99.3        | 100           | Meln1-2                | 91                | This Report            | Maintained in Natural Populations                                     |
| 219            | 219                         | Splicing      | Arabidopsis | D                           | Strong          | ACC1  | BC              | NA               | NA          | NA            | <i>gk-U413; gk-sc</i>  | 114               | Kajiwara et al. (2004) | Embryo Defective; Updated Location                                    |
| 333            | G333D                       | Missense      | Arabidopsis | D                           | Strong          | ACC1  | BC              | 99.4             | 97.1        | 100           | <i>acc1-3</i>          | 231               | Kajiwara et al. (2004) | Embryo Defective; Seeds Unavailable                                   |
| 363            | F363L                       | Missense      | Arabidopsis | PD                          | Some Function   | ACC2  | BC              | 99.3             | 97.1        | 100           | Sei-0                  | Same              | This Report            |                                                                       |
| 376            | V376A                       | Missense      | Arabidopsis | PD                          | Some Function   | ACC2  | BC              | 100.0            | 100.0       | 100           | Col-0                  | Same              | This Report            |                                                                       |
| 383            | Y383H                       | Missense      | Arabidopsis | ND                          | Normal          | ACC1  | BC              | 90.6             | 71.9        | 80            | Consensus              |                   | This Report            | ACC1 Consensus Differs from ACC2                                      |
| 397            | Q397X                       | Nonsense      | Drosophila  | D                           | Strong          | ACC   | BC              | NA               | NA          | NA            | <i>Acc<sup>1</sup></i> | 359               | Sasamura et al. (2013) | Lethal                                                                |
| 402-3          | x                           | x             | Arabidopsis | x                           | x               | x     | Large Intron    | x                | x           | x             | x                      | x                 | x                      | Large Intron                                                          |
| 404            | I404K                       | Missense      | Arabidopsis | LD                          | Strong          | ACC2  | BC              | 94.8             | 100.0       | 95            | Knox-18 Group          | Same              | This Report            | See Others in Group                                                   |
| 406            | E406K                       | Missense      | Arabidopsis | D                           | Weak            | ACC1  | BC              | 100.0            | 100.0       | 100           | <i>sfr1</i>            | 304               | Amid et al. (2012)     | Vegetative Phenotype                                                  |
| 443            | Y443C                       | Missense      | Arabidopsis | PD                          | Strong          | ACC2  | BC              | 94.0             | 92.8        | 95            | Etna-2                 | Same              | This Report            | Crosses Remain to be Analyzed                                         |

|     |          |               |                   |     |               |      |                 |          |          |        |                          |      |                         |                                         |
|-----|----------|---------------|-------------------|-----|---------------|------|-----------------|----------|----------|--------|--------------------------|------|-------------------------|-----------------------------------------|
| 456 | N456I    | Missense      | Drosophila        | D   | Strong        | ACC  | BC              | 100.0    | 100.0    | 100    | Acc <sup>2</sup>         | 417  | Sasamura et al. (2013)  | Lethal                                  |
| 474 | L474F    | Missense      | Arabidopsis       | PD  | Some Function | ACC2 | BC              | 94.5     | 97.8     | 100    | Chi-0                    | Same | This Report             |                                         |
| 475 | P475L    | Missense      | Arabidopsis       | LND | Normal        | ACC2 | BC              | 99.7     | 99.3     | 100    | Lm-2                     | Same | This Report             |                                         |
| 478 | Q478K    | Missense      | Arabidopsis       | LND | Normal        | ACC2 | BC              | 97.6     | 99.3     | 100    | Uod-1                    | Same | This Report             |                                         |
| 493 | I493L    | Missense      | Arabidopsis       | ND  | Normal        | ACC1 | BC              | 94.6     | 99.3     | 100    | Multiple                 | 391  | This Report             | Maintained in Natural Populations       |
| 494 | R494G    | Missense      | Arabidopsis       | PD  | Some Function | ACC2 | BC              | 99.9     | 99.3     | 100    | Ip-Pal-0                 | Same | This Report             |                                         |
| 520 | F520L    | Missense      | Arabidopsis       | PD  | Some Function | ACC2 | BC              | 94.0     | 82.7     | 40     | In-0                     | Same | This Report             |                                         |
| 528 | P528S    | Missense      | Arabidopsis       | ND  | Normal        | ACC1 | BC              | 90.1     | 99.3     | 90     | Multiple                 | 426  | This Report             | Maintained in Natural Populations       |
| 538 | T538A    | Missense      | Arabidopsis       | PD  | Some Function | ACC2 | BC              | 99.9     | 99.3     | 100    | Ip-Tor-1                 | Same | This Report             |                                         |
| 564 | M564V    | Missense      | <i>C. elegans</i> | (D) | Weak          |      | BC              | 93.3 (V) | 93.5 (V) | 95 (V) | ye60 (A471V)             | 471  | Rappleye et al. (2003)  | Temperature Sensitive                   |
| 565 | W565A    | Site Directed | Yeast             | D   | Strong        | ACC1 | Dimer Interface | 99.3     | 97.1     | 100    | W487A                    | 487  | Wei and Tong (2015)     | Loss of Enzyme Activity <i>in vitro</i> |
| 565 | W565X    | Nonsense      | Arabidopsis       | D   | Strong        | ACC1 | BC              | NA       | NA       | NA     | emb22                    | 463  | Kajiwara et al. (2004)  | Embryo Defective                        |
| 572 | See Text | Splicing      | Arabidopsis       | D   | Strong        | ACC2 | Intron 10       | NA       | NA       | NA     | Gn-1; "Gn2-3"            | Same | This Report             | Results in Frameshift                   |
| 668 | S668S    | Missense      | Yeast             | (D) | Weak          | ACC1 |                 | 33.0 (H) | 68.4 (S) | 35 (S) | acc1 <sup>ts</sup> (F>S) |      | Schneiter et al. (2000) |                                         |
| 686 | Q686R    | Site Directed | Yeast             | LND | Normal        | ACC1 |                 | 96.7     | 99.3     | 95     | Q608R                    | 608  | Wei and Tong (2015)     | Functional Enzyme <i>in vitro</i>       |
| 725 | N725S    | Missense      | Arabidopsis       | LND | Normal        | ACC2 |                 | 96.9     | 95.7     | 100    | Pog-0                    | Same | This Report             |                                         |
| 734 | H734E    | Site Directed | Yeast             | LND | Normal        | ACC1 |                 | 44.2 (R) | 69.8 (H) | 70 (H) | R656E                    | 656  | Wei and Tong (2015)     | Functional Enzyme <i>in vitro</i>       |
| 739 | G739E    | Missense      | Arabidopsis       | PD  | Some Function | ACC2 |                 | 95.2     | 97.8     | 95     | Wa-1                     | Same | This Report             |                                         |
| 753 | Y753X    | Nonsense      | Arabidopsis       | D   | Strong        | ACC2 |                 | NA       | NA       | NA     | Kb-0; Kl-5               | Same | This Report             |                                         |

|            |               |               |             |          |                     |      |                    |          |              |          |                              |      |                         |                                       |
|------------|---------------|---------------|-------------|----------|---------------------|------|--------------------|----------|--------------|----------|------------------------------|------|-------------------------|---------------------------------------|
| 762        | R762C         | Missense      | Arabidopsis | ND       | Normal              | ACC2 |                    | 96.6     | 97.1         | 100      | Tsu-0; Tu-0                  | Same | This Report             |                                       |
| 774        | See Fig. S2   | Deletion      | Arabidopsis | D        | Strong              | ACC2 | Intron 17; Exon 18 | NA       | NA           | NA       | Ip-Ber-0                     | Same | This Report             | 23 bp Deletion; Defective Transcripts |
| 777        | D777N         | Missense      | Arabidopsis | PD       | Some Function       | ACC2 | (BCCP)             | 97.2     | 100.0        | 95       | Leska-1-44; Smolj-1          | Same | This Report             |                                       |
| 794        | V794I         | Missense      | Arabidopsis | ND       | Normal              | ACC1 | BCCP               | 85.6     | 84.9         | 95       | Multiple                     | 692  | This Report             | Maintained in Natural Populations     |
| 813        | K813R         | Site Directed | Yeast       | D        | Strong              | ACC1 | Biotin Binding     | 100.0    | 100.0        | 100      | Biotin Binding               | 735  | Schneiter et al. (1996) | Site-Directed Mutagenesis             |
| 833        | G833R         | Missense      | Arabidopsis | PD       | Some Function       | ACC2 | BCCP               | 99.3     | 98.6         | 100      | Dja-1                        | Same | This Report             |                                       |
| 847        | L847P         | Missense      | Arabidopsis | PD       | Some Function       | ACC2 | Central            | 96.0     | 100.0        | 100      | WAR                          | Same | This Report             |                                       |
| 865        | R865X         | Nonsense      | Arabidopsis | D        | Strong              | ACC2 | Central            | NA       | NA           | NA       | "Nossen"                     | Same | Parker et al. (2014)    |                                       |
| 901        | See Text      | Splicing      | Arabidopsis | D        | Strong              | ACC2 | Intron 19          | NA       | NA           | NA       | WI-0                         | Same | This Report             | Results in Frameshift                 |
| 955        | [955]         | Insertion     | Arabidopsis | D        | Strong              | ACC2 | Exon 21            | NA       | NA           | NA       | acc2-2                       | Same | Salk Insertion          | T-DNA Insertion Mutant                |
| 1171       | 1171fs        | Frameshift    | Arabidopsis | D        | Strong              | ACC2 | Central            | NA       | NA           | NA       | Ip-Alo-0; Ip-Vin-0           | Same | This Report             |                                       |
| 1206       | F1206L        | Missense      | Arabidopsis | LD       | Moderate            | ACC2 | Central            | 96.3     | 100          | 85       | Aitba-1                      | Same | This Report             |                                       |
| 1225       | K1225X        | Nonsense      | Arabidopsis | D        | Strong              | ACC2 | Central            | NA       | NA           | NA       | Blh-1                        | Same | This Report             |                                       |
| 1229       | [1229]        | Insertion     | Arabidopsis | D        | Strong              | ACC2 | Exon 27            | NA       | NA           | NA       | acc2-1                       | Same | Salk Insertion          | T-DNA Insertion Mutant                |
| 1355       | E1355G        | Missense      | Arabidopsis | VUS; LND | Uncertain; (Normal) | ACC2 | Central            | 98.7     | 100.0        | 100      | Knox-18 Group; (Si-0; Ema-1) | Same | This Report             |                                       |
| 1376; 1377 | K1376R; Δ1377 | Deletion      | Arabidopsis | LD       | Strong              | ACC2 | Central            | Low Low  | 80.6<br>43.9 | 35<br>20 | Qar-8a                       | Same | This Report             | Crosses Remain to be Analyzed         |
| 1405       | R1405Q        | Missense      | Arabidopsis | PD       | Some Function       | ACC2 | Central            | 96.1     | 100.0        | 100      | Db-1                         | Same | This Report             |                                       |
| 1479       | Δ1479         | Deletion      | Arabidopsis | PD       | Some Function       | ACC2 | Central            | 19.3 (E) | 92.1 (E)     | 45 (E)   | Ip-Voz-0                     | Same | This Report             | Arabidopsis ACC2: Glu                 |

|      |             |           |                   |     |               |            |                     |          |          |        |                                |            |                                  |                                                                           |
|------|-------------|-----------|-------------------|-----|---------------|------------|---------------------|----------|----------|--------|--------------------------------|------------|----------------------------------|---------------------------------------------------------------------------|
| 1562 | See Fig. S1 | Splicing  | Arabidopsis       | D   | Strong        | ACC2       | Intron 29           | NA       | NA       | NA     | Spro-2; Ste-2; Ste-3; Vimmerby | Same       | This Report                      | Variety of Defective Transcripts                                          |
| 1603 | K1603Q      | Missense  | Arabidopsis       | ND  | Normal        | ACC1       |                     | 91.0     | 88.5     | 80     | Consensus                      |            | This Report                      | ACC1 Consensus Differs from ACC2                                          |
| 1621 | x           | x         | Arabidopsis       | x   | x             | x          | Start of Large Exon | x        | x        | x      | x                              | x          | TAIR                             | Start of Large Exon (# 31 of 32)                                          |
| 1623 | E1623E      | Missense  | <i>C. elegans</i> |     | Weak          |            | CT-Beta             | 61.3 (R) | 87.1 (E) | 35 (E) | ye162 (G1351E)                 | 1351       | Rappleye et al. (2003)           |                                                                           |
| 1689 | E1689K;G    | Missense  | Arabidopsis       | D   | Strong        | ACC1; ACC2 | CT-Beta             | 97.0     | 99.3     | 100    | pas3-1 (E>K); Ts-1 (E>G)       | 1588; Same | Baud et al. (2004); This Report  | Embryo Defective ( <i>acc1</i> ); Spectinomycin Sensitive ( <i>acc2</i> ) |
| 1739 | S1739C      | Missense  | Arabidopsis       | PD  | Some Function | ACC2       | CT-Beta             | 94.3     | 86.3     | 90     | CYR                            | Same       | This Report                      | Conserved Residue in CoA Binding Pocket                                   |
| 1766 | G1766D      | Missense  | Arabidopsis       | LND | Normal        | ACC2       | CT-Beta             | 97.6     | 99.3     | 100    | Pog-0                          | Same       | This Report                      |                                                                           |
| 1794 | G1794A      | Missense  | Arabidopsis       | ND  | Normal        | ACC1       | CT-Beta             | 94.8     | 100.0    | 95     | Multiple                       | 1693       | This Report                      | Maintained in Natural Populations                                         |
| 1815 | I > L,V,A,T | Missense  | Resistant Grasses | ND  | Normal        | ACC2       | CT-Beta             | 94.3 (L) | 74.8 (L) | 90 (L) | Plastid ACCase                 | 1781       | Kaundun (2014) GenBank: AJ310767 | Herbicide Resistant Grasses; Arabidopsis ACC2: Leu                        |
| 1821 | I1821V      | Missense  | Arabidopsis       | PD  | Some Function | ACC2       | CT-Beta             | 98.2     | 100.0    | 100    | MNF-Che-2                      | Same       | This Report                      |                                                                           |
| 1834 | T1834S      | Missense  | Arabidopsis       | PD  | Some Function | ACC2       | CT-Beta             | 99.4     | 100.0    | 100    | Nemrut-1                       | Same       | This Report                      |                                                                           |
| 1854 | [1854]      | Insertion | Arabidopsis       | D   | Strong        | ACC1       | CT-Beta             | NA       | NA       | NA     | <i>acc1-1</i>                  | 1753       | Baud et al. (2004)               |                                                                           |
| 1878 | R1878X      | Nonsense  | Yeast             | D   |               | ACC1       | CT-Beta             | NA       | NA       | NA     | <i>Acc1<sup>C-term</sup></i>   |            | Schneiter et al. (2000)          |                                                                           |
| 1883 | S1883T      | Missense  | Arabidopsis       | PD  | Some Function | ACC2       | CT-Beta             | 97.0     | 100.0    | 100    | Several                        | Same       | This Report                      |                                                                           |
| 1888 | G1888S      | Missense  | Arabidopsis       | D   | Strong        | ACC1       | CT-Beta             | 99.4     | 100      | 100    | pas3-2                         | 1787       | Baud et al. (2004)               | Embryo Defective                                                          |
| 1889 | G1889A      | Missense  | Yeast             | (D) | Weak          | ACC1       | CT-Beta             | 99.4     | 100      | 100    | <i>Acc1<sup>GS</sup></i>       |            | Schneiter et al. (2000)          |                                                                           |
| 1890 | P1890C      | Missense  | <i>C. elegans</i> | (D) | Weak          |            | CT-Beta             | 42.1 (T) | 97.1 (P) | 45 (P) | ye180                          |            | Rappleye et al. (2003)           |                                                                           |
| 1897 | G1897S      | Missense  | Arabidopsis       | PD  | Some Function | ACC2       | CT-Alpha            | 99.4     | 100.0    | 100    | Sch1-7; WalHaesB4              | Same       | This Report                      |                                                                           |



|      |           |            |                   |     |               |      |                   |          |          |        |                |      |                                     |                                                    |
|------|-----------|------------|-------------------|-----|---------------|------|-------------------|----------|----------|--------|----------------|------|-------------------------------------|----------------------------------------------------|
| 1902 | T1902K    | Missense   | Arabidopsis       | LD  | Strong        | ACC2 | CT-Alpha          | 87.6     | 100.0    | 95     | Knox-18 Group  | Same | This Report                         | See Others in Group                                |
| 1968 | G1968E    | Missense   | Arabidopsis       | D   | Moderate      | ACC1 | CT-Alpha          | 99.0     | 99.3     | 100    | <i>gk-101</i>  | 1867 | Kajiwara et al. (2004)              | Embryo Defective; Seeds Unavailable                |
| 2013 | P2013L    | Missense   | Arabidopsis       | PD  | Some Function | ACC2 | CT-Alpha          | 98.5     | 97.1     | 95     | Balan-1        | Same | This Report                         |                                                    |
| 2014 | A2014E    | Missense   | Arabidopsis       | PD  | Some Function | ACC2 | CT-Alpha          | 99.0     | 97.8     | 100    | App1-16        | Same | This Report                         |                                                    |
| 2020 | 2020fs    | Frameshift | Arabidopsis       | D   | Strong        | ACC2 | CT-Alpha          | NA       | NA       | NA     | Lu4-2; Lu3-30  | Same | This Report                         |                                                    |
| 2033 | W > C,L,S | Missense   | Resistant Grasses | ND  | Normal        | ACC2 | CT-Alpha          | 98.5     | 98.6     | 100    | Plastid ACCase | 1999 | Kaundun (2014)<br>GenBank: AJ310767 | Herbicide Resistant Grasses; Arabidopsis ACC2: Trp |
| 2059 | A2059V    | Missense   | Arabidopsis       | VUS | Uncertain     | ACC2 | CT-Alpha          | 98.2     | 98.6     | 100    | Grivo-1        | Same | This Report                         | Crosses Suggest ACC2 is Functional                 |
| 2061 | W > C     | Missense   | Resistant Grasses | ND  | Normal        | ACC2 | CT-Alpha          | 97.3     | 98.6     | 100    | Plastid ACCase | 2027 | Kaundun (2014)<br>GenBank: AJ310767 | Herbicide Resistant Grasses; Arabidopsis ACC2: Trp |
| 2098 | P2098S    | Missense   | Arabidopsis       | VUS | Some Function | ACC2 | CT-Alpha          | 93.0     | 97.8     | 100    | Hod            | Same | This Report                         | Nonsense Mutation Also Present                     |
| 2112 | D > G     | Missense   | Resistant Grasses | ND  | Normal        | ACC2 | CT-Alpha          | 98.5     | 97.8     | 100    | Plastid ACCase | 2078 | Kaundun (2014)<br>GenBank: AJ310767 | Herbicide Resistant Grasses; Arabidopsis ACC2: Asp |
| 2115 | I2115R    | Missense   | Arabidopsis       | PD  | Some Function | ACC2 | CT-Alpha          | 98.2     | 97.8     | 100    | lasi-1         | Same | This Report                         |                                                    |
| 2122 | C > R     | Missense   | Resistant Grasses | ND  | Normal        | ACC2 | CT-Alpha          | 81.9 (M) | 70.5 (M) | 80 (M) | Plastid ACCase | 2088 | Kaundun (2014)<br>GenBank: AJ310767 | Herbicide Resistant Grasses; Arabidopsis ACC2: Met |
| 2130 | G > A,S   | Missense   | Resistant Grasses | ND  | Normal        | ACC2 | CT-Alpha          | 80.1     | 96.4     | 90     | Plastid ACCase | 2096 | Kaundun (2014)<br>GenBank: AJ310767 | Herbicide Resistant Grasses; Arabidopsis ACC2: Gly |
| 2207 | H2207Q    | Missense   | Arabidopsis       | PD  | Some Function | ACC2 | CT-Alpha          | 98.1     | 98.6     | 100    | Ip-Lso-0       | Same | This Report                         |                                                    |
| 2208 | [2208]    | Insertion  | Arabidopsis       | D   | Strong        | ACC1 | CT-Alpha          | NA       | NA       | NA     | <i>acc1-2</i>  | 2107 | Baud et al. (2004)                  |                                                    |
| 2325 | Q2325X    | Nonsense   | Arabidopsis       | VUS | Some Function | ACC2 |                   | NA       | NA       | NA     | Hod            | Same | This Report                         |                                                    |
| 2337 | x         | x          | Arabidopsis       | x   | x             | x    | End of Large Exon | x        | x        | x      | x              | x    | TAIR                                | End of Large Exon (# 31 of 32)                     |
| 2355 | x         | x          | Arabidopsis       | x   | x             | x    | End of Protein    | x        | x        | x      | x              | x    | TAIR                                | End of ACC2 Protein                                |

<sup>a</sup> The first letter denotes the most common residue found among 855 sequenced accessions.

<sup>b</sup> D, Deleterious to protein function; LD, Likely deleterious; PD, Potentially deleterious; VUS, Variant of unknown significance; LND, Likely not deleterious; ND, Not deleterious to protein function.

345

| Variant Confirmed <sup>a</sup> | Accession  | ABRC Stock | Residue    | 1001 Genomes Predicted Variant                          | Notes                            |
|--------------------------------|------------|------------|------------|---------------------------------------------------------|----------------------------------|
| No                             | Borky      | CS76453    | 788        | K788M                                                   | ACC2 Reverse                     |
| No                             | BRI-2      | CS76725    | 1677       | G1677R                                                  | ACC2 Reverse                     |
| No                             | C24        | CS28127    | 725        | N725S                                                   | ACC2 Reverse                     |
| No                             | Can-0      | CS76740    | 777        | D777N                                                   | ACC2 Reverse                     |
| No                             | CATS-6     | CS76760    | Intron 4   | Splice Acceptor                                         | Putative Splicing                |
| No                             | Giffo-1    | CS76878    | 2082; 2083 | I2082M; V2083G                                          | ACC2 Reverse                     |
| No                             | Gn2-3      | CS76881    | FL cDNA    | Multiple                                                | Identical to Gn-1                |
| No                             | Koren-1    | CS76983    | 271*; 272* | A271D*; Q272R*                                          | * ACC2 Variant # (ACC1 Reverse)  |
| No                             | Lip-0      | CS76542    | 833        | G833R                                                   | ACC2 Reverse                     |
| No                             | Olympia-2  | CS77144    | 230        | TTG > T-G                                               | Putative Frameshift              |
| No                             | Pna-10     | CS76574    | 1883       | S1883T Not Confirmed;<br>I404K; T1902K<br>Not Predicted | Belongs Instead to Knox-18 Group |
| No                             | Sha        | CS28736    | 376; 725   | V376A; N725S                                            | Accession Name Duplicate         |
| No                             | SLSP-35    | CS77255    | 404; 1902  | I404K; T1902K                                           | Not Part of Knox-18 Group        |
| No                             | UKSW06-333 | CS78813    | 404; 1902  | I404K; T1902K                                           | Not Part of Knox-18 Group        |
| No                             | Ulies-1    | CS78815    | 742*       | L742S                                                   | * ACC2 Variant # (ACC1 Reverse)  |
| No                             | Ullapool-8 | CS78821    | Intron 4   | Splice Acceptor                                         | Putative Splicing                |
|                                |            |            |            |                                                         |                                  |
| Yes                            | Aitba-1    | CS76649    | 1206       | F1206L                                                  | Forward Screen                   |
| Yes                            | App1-16    | CS76669    | 2014       | A2014E                                                  | ACC2 Reverse                     |
| Yes                            | Balan-1    | CS76687    | 2013       | P2013L                                                  | ACC2 Reverse                     |
| Yes                            | Blh-1      | CS28089    | 1225       | K1225X                                                  | Putative Null                    |
| Yes                            | Chi-0      | CS76464    | 474        | L474F                                                   | ACC2 Reverse                     |
| Yes                            | Col-0      | Lab        | 376        | V376A                                                   | ACC2 Reverse                     |
| Yes                            | CYR        | CS76790    | 1739       | S1739C                                                  | ACC2 Reverse                     |
| Yes                            | Db-1       | CS28203    | 1405       | R1405Q                                                  | ACC2 Reverse                     |
| Yes                            | Dja-1      | CS76473    | 833        | G833R                                                   | ACC2 Reverse                     |
| Yes                            | Ema-1      | CS76480    | 1355       | E1355G                                                  | ACC2 Reverse                     |
| Yes                            | Etna-2     | CS76487    | 443        | Y443C                                                   | Forward Screen                   |
| Yes                            | Gn-1       | CS76880    | 572        | Splice Defect                                           | Putative Null                    |
| Yes                            | Grivo-1    | CS76888    | 2059       | A2059V                                                  | ACC2 Reverse                     |
| Yes                            | Hod        | CS76924    | 2098       | P2098S                                                  | ACC2 Reverse                     |
| Yes                            | Hod        | CS76924    | 2325       | Q2325X                                                  | Putative Null                    |

|       |            |         |              |                    |                                 |
|-------|------------|---------|--------------|--------------------|---------------------------------|
| Yes   | Hof-1      | CS76925 | Intron 4     | Small Insertion    | Putative Null                   |
| Yes   | lasi-1     | CS76944 | 2115         | I2115R             | ACC2 Reverse                    |
| Yes   | In-0       | CS76516 | 520          | F520L              | ACC2 Reverse                    |
| Yes   | Ip-Alo-0   | CS76662 | 1171         | R1171fs            | Putative Null                   |
| (Yes) | Ip-Ber-0   | CS78887 | 774          | Small Deletion     | Putative Null                   |
| Yes   | Ip-Cum-1   | CS76787 | 4; 618; 1165 | R4T; V618I; S1165C | Transit Peptide Reverse         |
| Yes   | Ip-Gua-1   | CS76894 | 4; 618; 1165 | R4T; V618I; S1165C | Transit Peptide Reverse         |
| Yes   | Ip-Hom-4   | CS76929 | 618          | V618I              | Compare with Ip-Cum-1           |
| Yes   | Ip-Lso-0   | CS77055 | 2207         | H2207Q             | ACC2 Reverse                    |
| Yes   | Ip-Pal-0   | CS77159 | 494          | R494G              | ACC2 Reverse                    |
| Yes   | Ip-Ren-6   | CS77212 | 1479         | Δ1479              | Putative Null                   |
| Yes   | Ip-Tor-1   | CS77378 | 538          | T538A              | ACC2 Reverse                    |
| Yes   | Ip-Vin-0   | CS78846 | 1171         | R1171fs            | Putative Null                   |
| Yes   | Ip-Vis-0   | CS78848 | 618          | V618I              | Compare with Ip-Cum-1           |
| (Yes) | Ip-Voz-0   | CS78849 | 1479         | Δ1479              | Putative Null                   |
| Yes   | Kb-0       | CS76524 | 753          | Y753X              | Putative Null                   |
| Yes   | KI-5       | CS76528 | 753          | Y753X              | Putative Null                   |
| Yes   | Knox-18    | CS76530 | 1404; 1902   | I404K; T1902K      | Forward Screen                  |
| Yes   | Knox-18    | CS76530 | FL cDNA      | Multiple           | FL cDNA Same as 1001 Genomes    |
| Yes   | La-0       | CS76538 | FL cDNA      | Multiple           | FL cDNA Same as 1001 Genomes    |
| Yes   | Leska-1-44 | CS77030 | 777          | D777N              | ACC2 Reverse                    |
| Yes   | Lm-2       | CS28473 | 475          | P475L              | ACC2 Reverse                    |
| (Yes) | Lu3-30     | CS77057 | 2020         | D2020fs            | Putative Null                   |
| Yes   | Lu4-2      | CS77058 | 2020         | D2020fs            | Putative Null                   |
| Yes   | Melni-2    | CS77080 | 193*         | A193V*             | * ACC2 Variant # (ACC1 Reverse) |
| Yes   | MNF-Che-2  | CS77096 | 1821         | I1821V             | ACC2 Reverse                    |
| Yes   | Nemrut-1   | CS76398 | 1834         | T1834S             | ACC2 Reverse                    |
| Yes   | Petergof   | CS77170 | 809*         | V809A*             | * ACC2 Variant # (ACC1 Reverse) |
| Yes   | Pog-0      | CS76576 | 725; 1766    | N725S; G1766D      | ACC2 Reverse                    |
| Yes   | Qar-8a     | CS76581 | 1376         | K1376R; Δ1377      | Putative Null                   |
| Yes   | RRS-10     | CS76592 | 1404; 1902   | I404K; T1902K      | Forward Screen                  |
| Yes   | Sch1-7     | CS77240 | 1897         | G1897S             | ACC2 Reverse                    |
| Yes   | Sei-0      | CS76599 | 363          | F363L              | ACC2 Reverse                    |
| Yes   | Si-0       | CS76601 | 1355         | E1355G             | ACC2 Reverse                    |
| Yes   | Smolj-1    | CS77256 | 777          | D777N              | ACC2 Reverse                    |
| Yes   | Spro-2     | CS77264 | 1562         | Splice Defect      | Putative Null                   |
| Yes   | Ste-2      | CS77274 | 1562         | Splice Defect      | Putative Null                   |

|                                                           |           |         |              |                                                  |                                     |
|-----------------------------------------------------------|-----------|---------|--------------|--------------------------------------------------|-------------------------------------|
| Yes                                                       | Ste-3     | CS77275 | 1562         | Splice Defect                                    | Putative Null                       |
| Yes                                                       | Tol-0     | CS76614 | 1404; 1902   | I404K; T1902K                                    | Forward Screen                      |
| Yes                                                       | Ts-1      | CS76615 | 1689         | E1689G                                           | ACC2 Reverse                        |
| Yes                                                       | Tsu-0     | CS28780 | 762          | R762C                                            | ACC2 Reverse                        |
| Yes                                                       | Tsu-0     | CS28780 | FL cDNA      | Multiple                                         | FL cDNA Same as 1001 Genomes        |
| Yes                                                       | Tu-0      | CS76617 | 762          | R762C                                            | ACC2 Reverse                        |
| Yes                                                       | Tul-0     | CS76618 | 1404; 1902   | I404K; T1902K                                    | Forward Screen                      |
| Yes                                                       | Uod-1     | CS76621 | 478          | Q478K                                            | ACC2 Reverse                        |
| Yes                                                       | Vimmerby  | CS78845 | 1562         | Splice Defect                                    | Putative Null                       |
| Yes                                                       | Wa-1      | CS76626 | 739          | G739E                                            | ACC2 Reverse                        |
| Yes                                                       | WalHaesB4 | CS76408 | 1897         | G1897S                                           | ACC2 Reverse                        |
| Yes                                                       | WAR       | CS78853 | 847          | L847P                                            | ACC2 Reverse                        |
| Yes                                                       | WAR       | CS78853 | 7**          | $\Delta 7$ (Tic20-IV)                            | ** TIC20-IV Transit Peptide Residue |
| Yes                                                       | WI-0      | CS76630 | 901          | Splice Defect                                    | Putative Null                       |
|                                                           |           |         |              |                                                  |                                     |
| Mixed                                                     | Gifu-2    | CS76494 | 404;<br>1902 | I404K Not Predicted;<br>T1902K Confirmed         | Knox-18 Group                       |
| Mixed                                                     | Mdn-1     | CS77077 | 404;<br>1567 | I404K; T1902K Confirmed;<br>E1567K Not Predicted | Knox-18 Group                       |
| <sup>a</sup> Variants were analyzed by Sanger sequencing. |           |         |              |                                                  |                                     |

348

| Name  | Primer Sequence          | Position            |
|-------|--------------------------|---------------------|
| F-01  | ATCCGATCTCCTTCTTGGATAATG | Exon 1              |
| F-02  | TCAGCTTATTGTGGAGGTGATTAG | Exon 2 / Intron 2   |
| F-03  | GGAAGGTCTGCTTCTGTAGATATG | Exon 4 / Intron 4   |
| F-04  | GCACATTCGCTACACAACATATC  | Intron 6            |
| F-05  | GGACGGGTTTGGATCGATATTA   | Intron 6            |
| F-06  | CAGAGACGAAGAAGACGAAGAAC  | Intron 6            |
| F-07  | ATGGAACATGGTGGAGGATATG   | Exon 9              |
| F-08  | CTCTACGTGATGGAGGTCTATTG  | Exon 16             |
| F-09  | AAGGCATCCTTGAGGTGATTAG   | Exon 21 / Intron 21 |
| F-10  | GACTTATGGAGCAGCTTGTTTATC | Exon 24             |
| F-11  | CTGCAGTTTCTGCCGAGTATAA   | Exon 26             |
| F-12  | CGACATGTTGAACCTCCTCTATC  | Exon 27             |
| F-13  | CATAGGTCTGTTGGAGTGAGAATG | Exon 29             |
| F-14  | CTCGGTGTAGCTGAAGAAGTAAA  | Exon 31             |
| F-15  | GGTAAATGGCTTGGTGGTATCT   | Exon 31             |
| F-16  | GCCTGAAGGGATGATAGAGATAAA | Exon 31             |
|       |                          |                     |
| R-01  | CTGCAGGAGGACCAAGAAATATAA | Exon 3              |
| R-02  | GTCTTCTCTGGACGCTACAATC   | Exon 6              |
| R-03  | CCAAACCCGTCCTACCATATAAT  | Intron 6            |
| R-04  | GGTGATTGGACCTTCTCTATG    | Exon 7              |
| R-05  | GACAGAGAAGTACGACCACATATT | Exon 10             |
| R-06  | AGTCCTAATATCTCCACGGATTG  | Exon 12             |
| R-07  | CTCCATCACGTAGAGTGTGTATTT | Exon 16             |
| R-08  | GAAATGGGAGTTCAGGGCTATC   | Exon 20             |
| R-09  | CTCTGTATGCAGCAGGATTAGG   | Exon 24             |
| R-10  | GATAAAGGAGCTCGGGCATATT   | Exon 26             |
| R-11  | CTATCTGCTGCTCACGTAGTATG  | Exon 28             |
| R-12  | CTGGCCTGTCTGTAACACTATAC  | Exon 28             |
| R-13  | CGGTTGGTCTAGTCTCTGTATG   | Exon 31             |
| R-14  | CGGTTTCATCAGCGTACATTTT   | Exon 31             |
|       |                          |                     |
| R-65  | ATTGTGCGCGCTAACAAATAC    | 3'-UTR              |
| F-109 | ATCCTTGAGACTATCTGGCTTGG  | 5'-UTR              |
|       |                          |                     |
| R-63  | GCCATTGCCACCAACTTTAC     | Exon 2 <sup>b</sup> |

<sup>a</sup> To prevent amplification of the adjacent *ACC1* locus, the first half of *ACC2* was amplified using F-109 and one of the reverse primers listed above; the second half utilized R-65 and one of the forward primers. The R-63 primer was used infrequently.

<sup>b</sup> Specific to *ACC2* N-terminus

351  
352
